# Supplementary material for: Changes of serum amino acid profiles by an epidermal growth factor receptor mutation and benzo[a]pyrene in mouse lung tumorigenesis
Source: Royal Society of Chemistry journal article supplement (doi:10.1039/c6tx00010j), 2016-01-01
Supplement: c6tx00010j1.pdf [file c6tx00010j1.pdf]

1 **Supplementary**

2

3 **Changes of serum amino acid profiles by epidermal growth factor**  
4 **receptor mutation and benzo[a]pyrene in mouse lung tumorigenesis**

5

6

7 Pinpin Lin<sup>1</sup>, Yi-Rong Chen<sup>2</sup>, Chao-Yu Chen<sup>3</sup>, Ya-Ting Chang<sup>3</sup>, Jhih-Sheng Chen<sup>3</sup>,

8 Ming-Hsien Tsai<sup>1</sup>, Cheng-Chin Kuo<sup>4</sup>, Hui-Ling Lee<sup>3\*</sup>

9

10 <sup>1</sup>*National Institute of Environmental Health Sciences, National Health Research*

11 *Institutes, Zhunan, Miaoli County 350, Taiwan*

12 <sup>2</sup>*Institute of Molecular and Genomic Medicine, National Health Research Institutes,*

13 *Zhunan, Miaoli County 350, Taiwan*

14 <sup>3</sup>*Department of Chemistry, Fu Jen Catholic University, Xinzhuang Dist, New Taipei*

15 *City 24205 Taiwan*

16 <sup>4</sup>*Institute of Cellular and System Medicine, National Health Research Institutes,*

17 *Zhunan, Miaoli County 350, Taiwan*

18

19 *\*Corresponding authors: Hui-Ling Lee, Ph.D.*

20 *Department of Chemistry, Fu Jen Catholic University, No.510 Zhongzheng Rd.*

21 *Xinzhuang Dist, New Taipei City 24205 Taiwan.*

22 *Tel: 886-2-29053573; Fax: 886-2-29023209; e-mail:076308@mail.fju.edu.tw*

23

24

25

26

27

1 **Supplementary Figure legends**

2 **Fig. S1** The results of principal component analysis (PCA) of serum from the vehicle  
3 mutant control (circle ○) and vehicle wild-type (filled triangle ▲) (A) 16 weeks old,  
4 (B) 32 weeks old, (C) 16 weeks old, and (D) 32 weeks old using positive ion modes  
5 and negative ion mode, respectively (n = 9).

6 **Fig. S2** Typical LC-ESI-TOF total ion chromatograms of serum.

7 Metabolites were extracted from serum from (A) mutant control, (B) 0.1 mg BaP-  
8 treated mice, (C) 2.0 mg BaP-treated mice for positive ion mode, (D) mutant control,  
9 (E) 0.1 mg BaP-treated mice ,and (F) 2.0 mg BaP-treated mice for negative ion mode.

10 **Table S1A** The list of significantly changed metabolites ( $p < 0.05$ ) in serum of  
11 vehicle groups, 0.1 mg/mouse BaP and 2 mg/mouse BaP for 16 weeks using positive  
12 ion modes

13 **Table S1B** The list of significantly changed metabolites ( $p < 0.05$ ) in serum of  
14 vehicle groups, 0.1 mg/mouse BaP and 2 mg/mouse BaP for 16 weeks using negative  
15 ion modes.

16 **Table S2** Amino acid concentrations in the sera of EGFR mutant control and wild-  
17 type control mice at 16 and 32 weeks old.

18

19

20

21 **Supplementary**

1

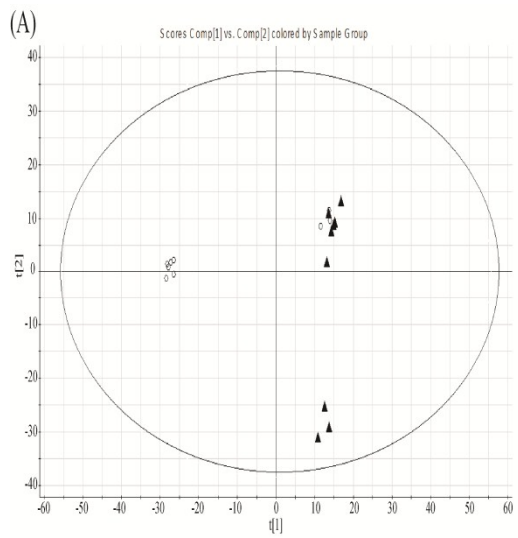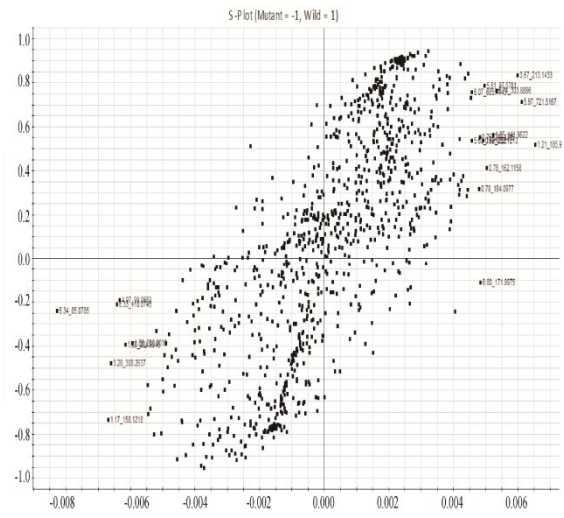

2

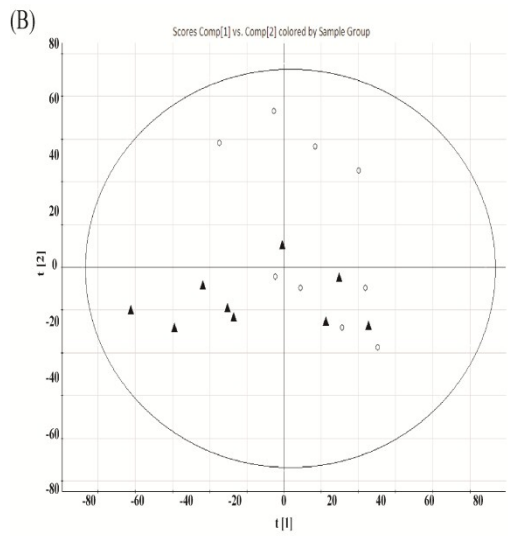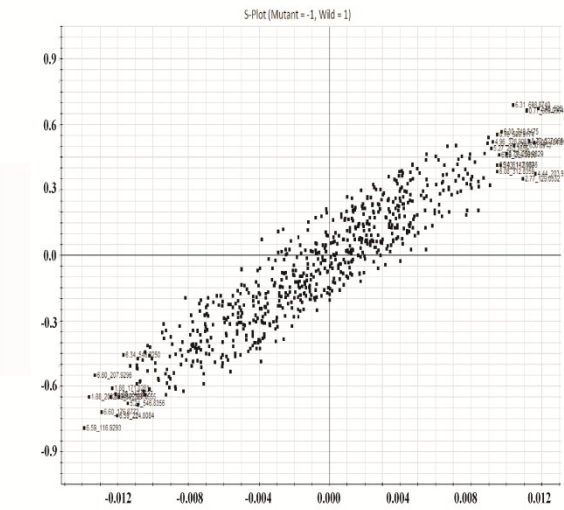

3

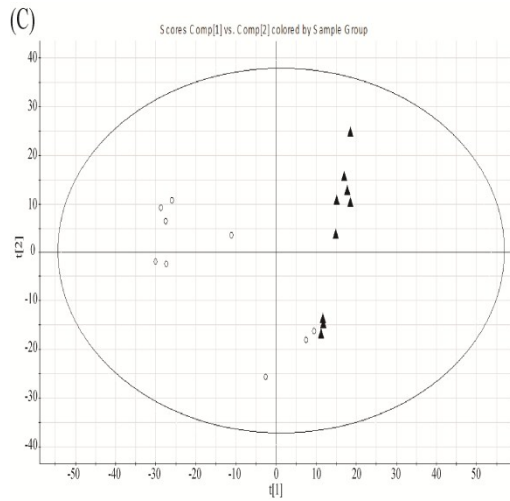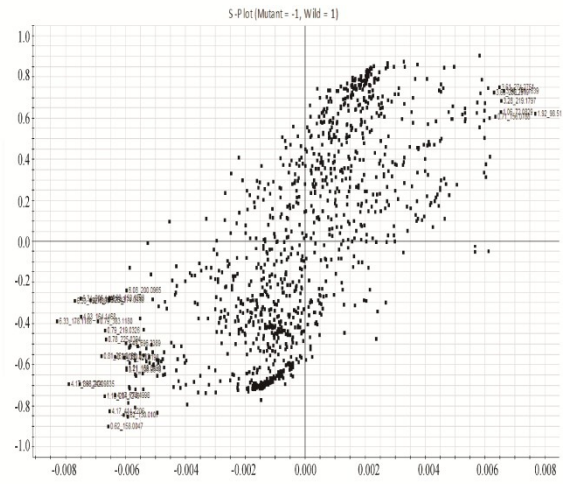

1

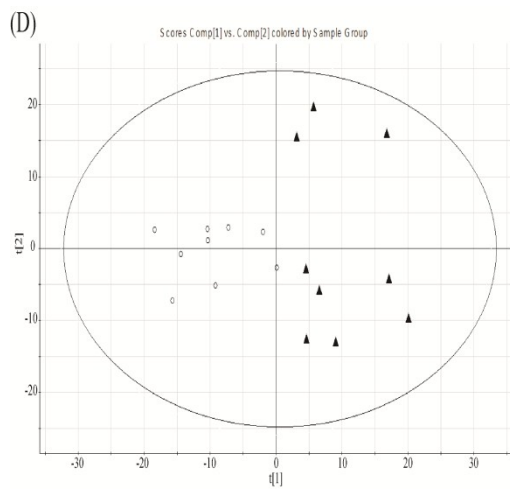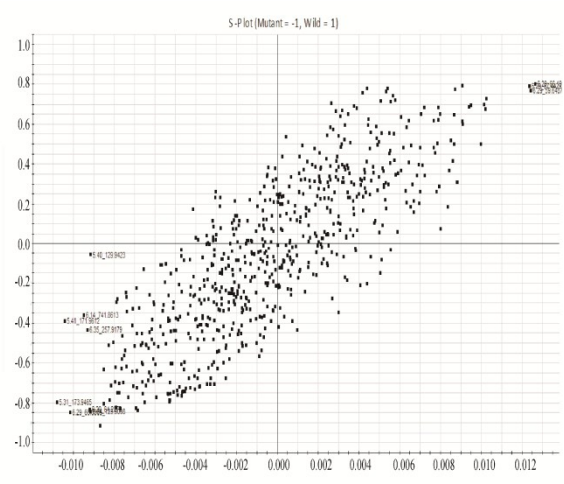

2

3 **Fig. S1** The results of principal component analysis (PCA) of serum from the vehicle  
 4 mutant control (circle  $\circ$ ) and vehicle wild-type (filled triangle  $\blacktriangle$ ) (A) 16 weeks old,  
 5 (B) 32 weeks old, (C) 16 weeks old, and (D) 32 weeks old using positive ion modes  
 6 and negative ion mode, respectively (n = 9).

7

8

(A)

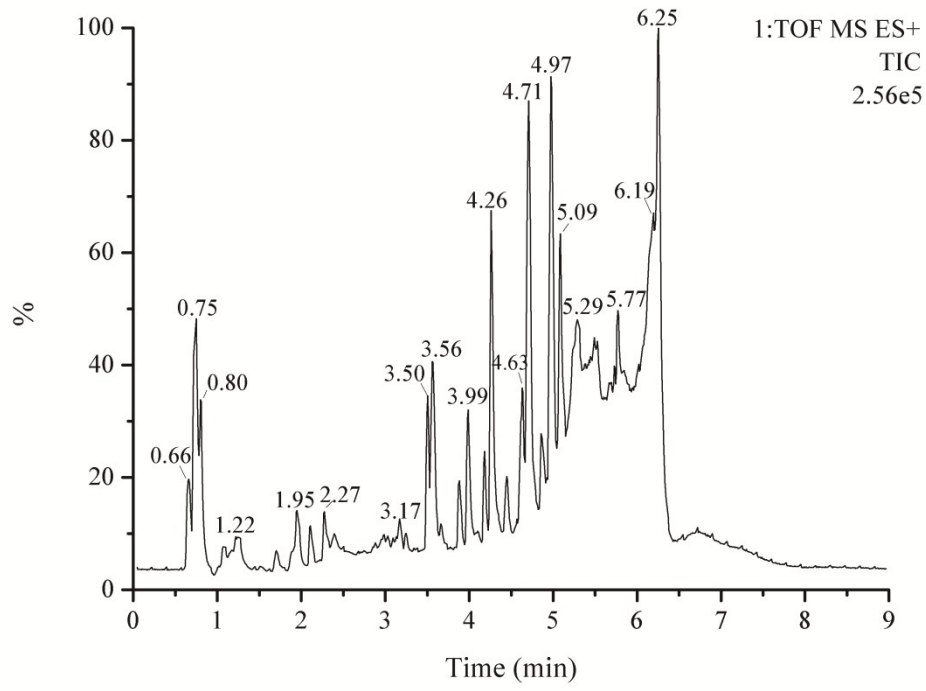

1

(B)

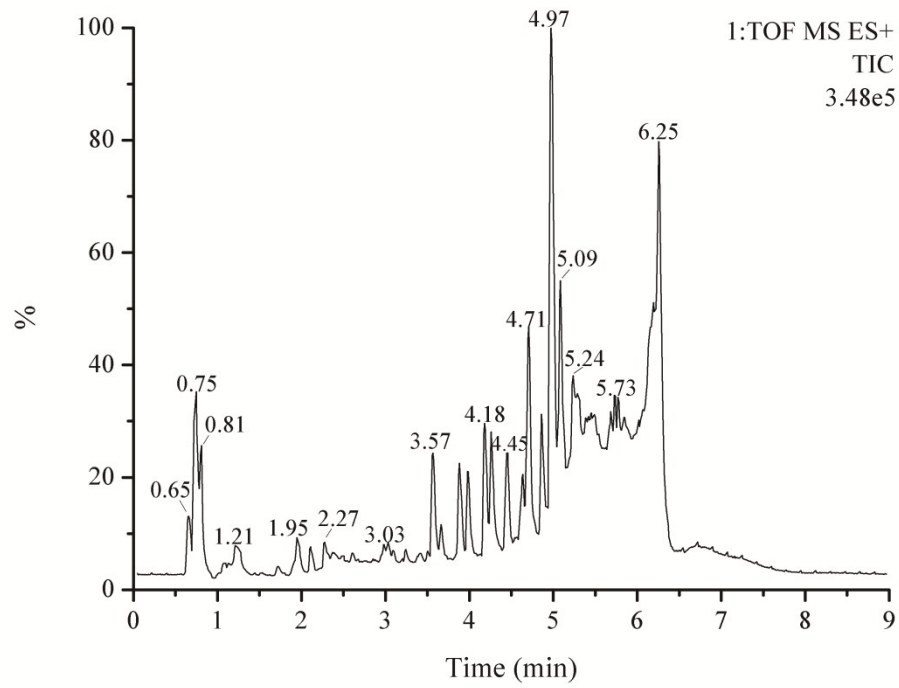

2

(C)

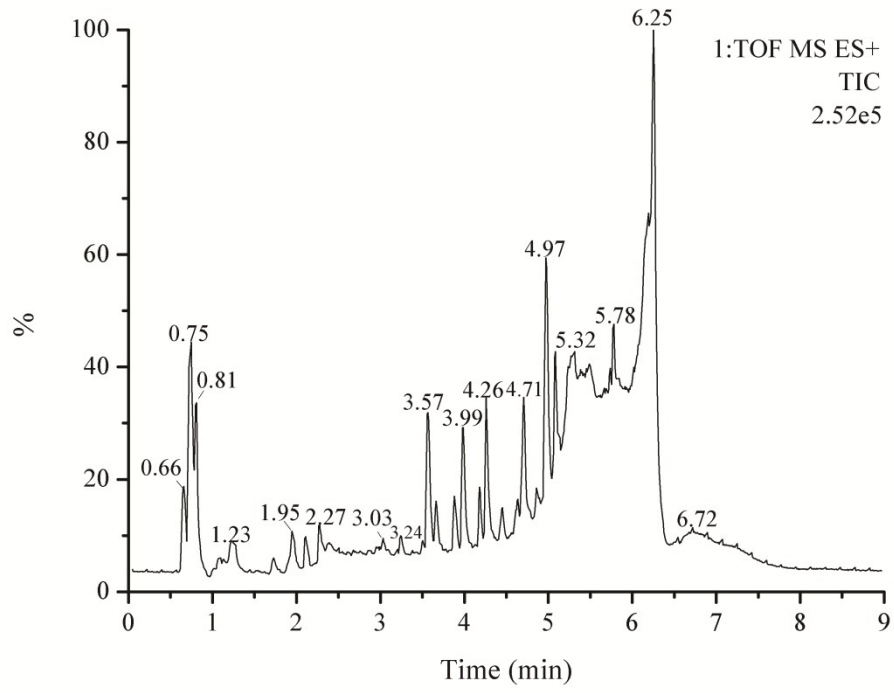

1

(D)

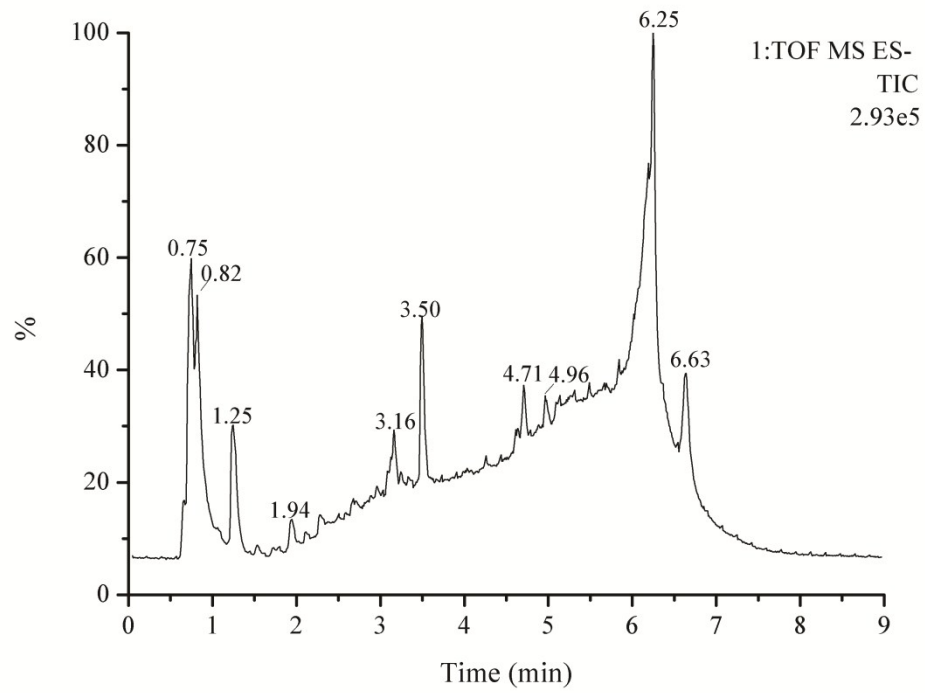

2

(E)

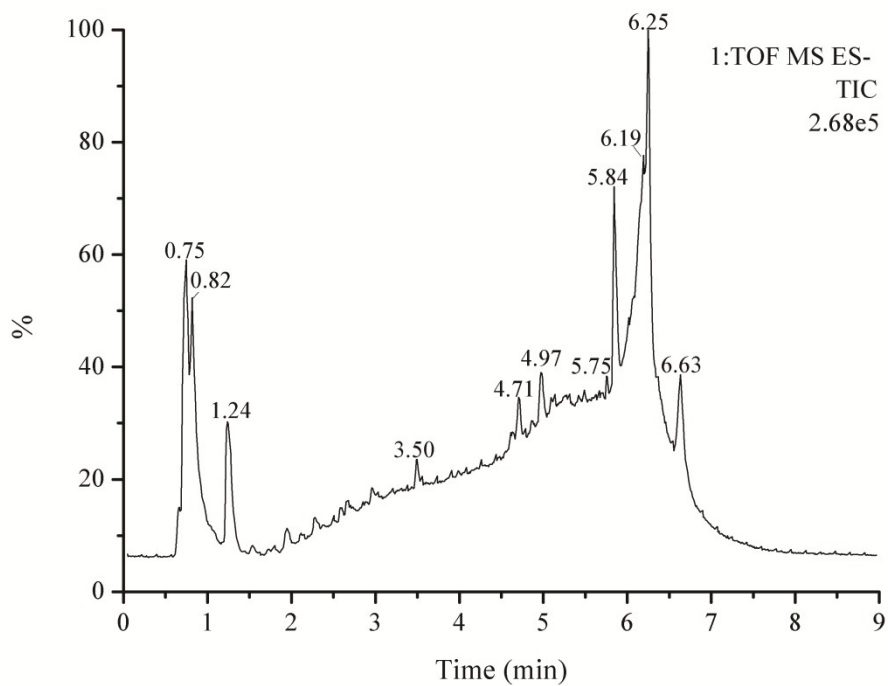

1

(F)

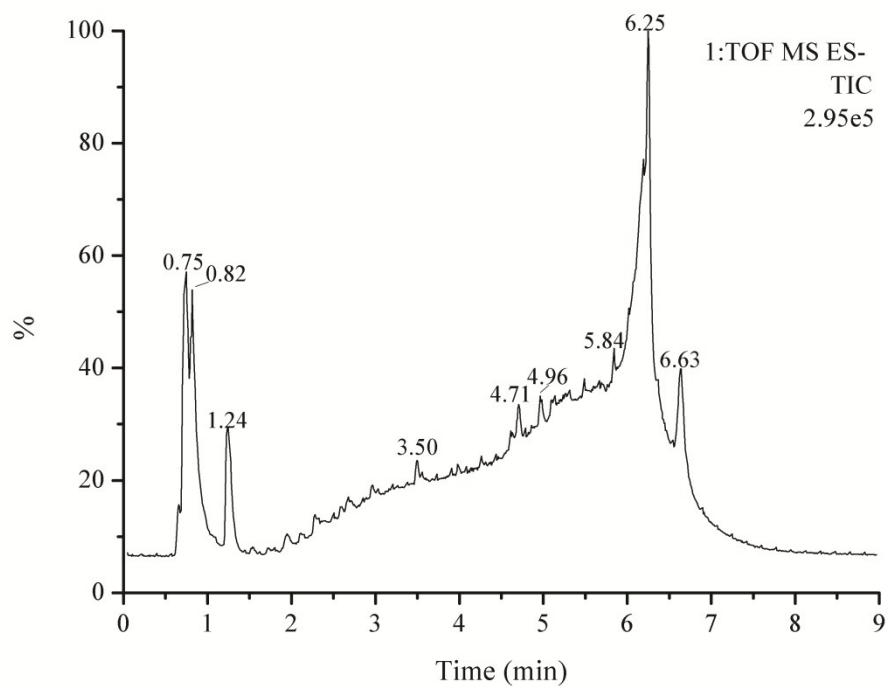

2

3 **Fig. S2** Typical LC-ESI-TOF total ion chromatograms of serum.

4 Metabolites were extracted from serum from (A) mutant control, (B) 0.1 mg BaP-

5 treated mice, (C) 2.0 mg BaP-treated mice for positive ion mode, (D) mutant control,

1 (E) 0.1 mg BaP-treated mice ,and (F) 2.0 mg BaP-treated mice for negative ion mode.

2



1 Table S1A The list of significantly changed metabolites ( $p < 0.05$ ) in serum of vehicle groups, 0.1 mg/mouse BaP and 2 mg/mouse BaP for 16  
 2 weeks using positive ion modes.

| 3                    | 4                                   | 5                 | 6                                 | 7            | 8                             | 9    |
|----------------------|-------------------------------------|-------------------|-----------------------------------|--------------|-------------------------------|------|
| Retention time (min) | Detected mass<br>[M+H] <sup>+</sup> | Name <sup>a</sup> | Database                          | VIP<br>value | Fold change<br>(over control) |      |
| 6                    | 0.73                                | 123.0927          | 2-Ethyl-3-methylpyrazine          | HMDB41254    | 2.34                          | 2.02 |
|                      | 0.77                                | 104.1044          | Choline                           | C00114       | 1.41                          | 2.18 |
| 7                    | 0.79                                | 151.1445          | (E)-4,8-Dimethyl-1,3,7-nonatriene | HMDB35792    | 2.00                          | 0.34 |
| 8                    | 0.8                                 | 114.0692          | Creatinine                        | HMDB00562    | 1.29                          | 1.64 |
|                      | 0.8                                 | 120.0696          | L-Threonine                       | HMDB00167    | 1.09                          | 0.81 |
| 9                    | 0.82                                | 126.0258          | Taurine                           | HMDB00251    | 1.26                          | 2.00 |
|                      | 0.85                                | 132.0803          | 3-Methylindole                    | HMDB00466    | 1.21                          | 1.55 |
| 10                   | 1.07                                | 146.0987          | 4-Guanidinobutanoic acid          | HMDB03464    | 1.80                          | 0.34 |
| 11                   | 1.93                                | 132.0941          | L-Leucine                         | HMDB00687    | 1.38                          | 0.76 |
|                      | 2.11                                | 166.0822          | L-Phenylalanine                   | HMDB00159    | 1.40                          | 0.58 |
| 12                   | 4.09                                | 325.3254          | 6,8-Heneicosanedione              | HMDB35570    | 2.19                          | 0.03 |
|                      | 5.43                                | 100.0751          | 2,5-Dihydro-2,4-dimethyloxazole   | HMDB40518    | 1.13                          | 1.63 |
| 13                   | 5.48                                | 675.5012          | PA(15:0/19:1(9Z))                 | LMGP10010147 | 2.09                          | 3.10 |
| 14                   | 6.15                                | 150.0599          | L-Methionine                      | HMDB00696    | 0.94                          | 0.86 |

15 <sup>a</sup> these putative metabolites were identified by comparing with METLIN (<http://metlin.scripps.edu>) and HMDB (<http://www.hmdb.ca/>) databases.

16  
 17  
 18  
 19  
 20

1 Table S1B The list of significantly changed metabolites ( $p < 0.05$ ) in serum of vehicle groups, 0.1 mg/mouse BaP and 2 mg/mouse BaP for 16  
 2 weeks using negative ion modes.

| Retention time (min) | Detected mass [M-H] <sup>-</sup> | Name <sup>a</sup>    | Database  | VIP value | Fold change (over control) |
|----------------------|----------------------------------|----------------------|-----------|-----------|----------------------------|
| 0.82                 | 132.0428                         | L-Aspartic Acid      | HMDB00191 | 1.34      | 0.64                       |
| 0.83                 | 174.1018                         | Argininic acid       | HMDB03148 | 2.03      | 0.68                       |
| 1.72                 | 180.0782                         | L-Tyrosine           | HMDB00158 | 1.92      | 0.65                       |
| 1.93                 | 59.0244                          | Urea                 | HMDB00294 | 1.75      | 0.56                       |
| 1.95                 | 188.0265                         | Kynurenic acid       | HMDB00715 | 1.72      | 0.56                       |
| 2.11                 | 164.0847                         | L-Phenylalanine      | HMDB00159 | 1.83      | 0.72                       |
| 2.28                 | 203.0943                         | L-Tryptophan         | HMDB00929 | 1.89      | 0.67                       |
| 2.96                 | 187.1103                         | N-Alpha-acetyllysine | HMDB00446 | 1.95      | 0.71                       |

3 <sup>a</sup> these putative metabolites were identified by comparing with METLIN (<http://metlin.scripps.edu>) and HMDB (<http://www.hmdb.ca/>) databases.

4

1  
 2 Table S2 Amino acid concentrations in the sera of EGFR mutant control and wild-type control mice at 16 and 32 weeks old.  
 3

|             | 16 weeks old            |                 |                    |                 | 32 weeks old            |                      |                   |                 |
|-------------|-------------------------|-----------------|--------------------|-----------------|-------------------------|----------------------|-------------------|-----------------|
|             | Mutant control (n = 14) |                 | Wild Type (n = 20) |                 | Mutant control (n = 11) |                      | Wild Type (n = 8) |                 |
|             | Conc. (mM) ±            | SD <sup>a</sup> | Conc. (mM) ±       | SD <sup>a</sup> | Conc. (mM) ±            | SD <sup>a</sup>      | Conc. (mM) ±      | SD <sup>a</sup> |
| Amino acids |                         |                 |                    |                 |                         |                      |                   |                 |
| Phe         | 0.057                   | ± 0.022         | 0.055              | ± 0.028         | 0.064                   | ± 0.018 <sup>c</sup> | 0.089             | ± 0.013         |
| Tyr         | 0.070                   | ± 0.019         | 0.063              | ± 0.016         | 0.105                   | ± 0.028 <sup>c</sup> | 0.163             | ± 0.046         |
| Ala         | 0.194                   | ± 0.056         | 0.206              | ± 0.092         | 0.177                   | ± 0.056 <sup>c</sup> | 0.286             | ± 0.067         |
| Pro         | 0.081                   | ± 0.019         | 0.073              | ± 0.03          | 0.041                   | ± 0.012 <sup>d</sup> | 0.062             | ± 0.01          |
| Val         | 0.166                   | ± 0.034         | 0.144              | ± 0.042         | 0.109                   | ± 0.025 <sup>b</sup> | 0.128             | ± 0.014         |
| Leu         | 0.113                   | ± 0.029         | 0.098              | ± 0.045         | 0.169                   | ± 0.066              | 0.189             | ± 0.033         |
| Met         | 0.040                   | ± 0.012         | 0.038              | ± 0.016         | 0.031                   | ± 0.007              | 0.032             | ± 0.003         |
| Trp         | 0.060                   | ± 0.019         | 0.054              | ± 0.022         | 0.106                   | ± 0.026 <sup>d</sup> | 0.149             | ± 0.022         |
| Thr         | 0.079                   | ± 0.027         | 0.071              | ± 0.024         | 0.033                   | ± 0.009 <sup>b</sup> | 0.04              | ± 0.004         |
| Gln         | 0.294                   | ± 0.070         | 0.34               | ± 0.087         | 0.237                   | ± 0.029              | 0.225             | ± 0.020         |
| Arg         | 0.057                   | ± 0.027         | 0.058              | ± 0.021         | 0.033                   | ± 0.007              | 0.034             | ± 0.002         |
| His         | 0.029                   | ± 0.012         | 0.035              | ± 0.013         | 0.014                   | ± 0.004 <sup>b</sup> | 0.018             | ± 0.003         |

4 <sup>a</sup> Concentration (mM) ± standard deviation

5 <sup>b</sup> \*p<0.05, <sup>c</sup>\*\*p<0.01, <sup>d</sup>\*\*\*p<0.001

6  
 7  
 8  
 9
